# Supplementary material for: Motor flexibility to stabilize the toe position during obstacle crossing in older adults: an investigation using an uncontrolled manifold analysis
Source: PubMed Central journal article supplement (PMC10995316; doi:10.3389/fspor.2024.1382194), 2024-03-22
Supplement: Datasheet1.pdf [file Datasheet1.pdf]

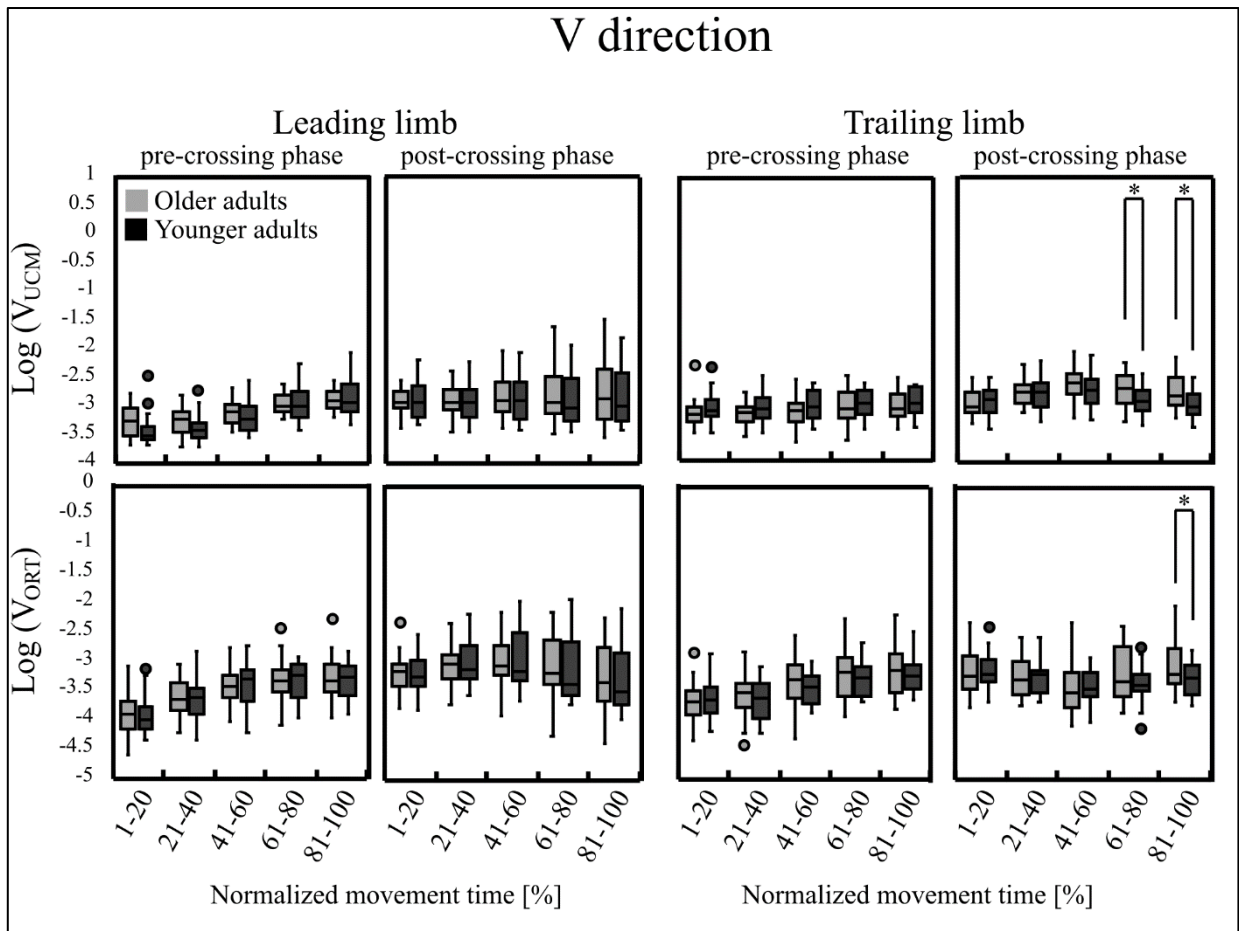

**Supplementary Figure S1.** Graphs of the mean  $\text{Log}(V_{UCM})$  and  $\text{Log}(V_{ORT})$  in the V direction. The top four panels indicate the  $\text{Log}(V_{UCM})$ , and the bottom four panels indicate the  $\text{Log}(V_{ORT})$ . Error bars represent the standard deviation among participants. \* indicates a significant difference. In the trailing limb during the post-crossing phase, the  $\text{Log}(V_{UCM})$  in older adults was significantly higher than that in younger adults at 61–80% ( $t(45) = -2.83, p = .007$ ) and 81–100% ( $t(45) = -2.66, p = .011$ ). In the trailing limb during the post-crossing phase, the  $\text{Log}(V_{ORT})$  in older adults was significantly higher than that in younger adults at 81–100% ( $t(45) = -2.23, p = .031$ ). No other difference between older and younger adults was found.
