# Supplementary material for: Motor flexibility to stabilize the toe position during obstacle crossing in older adults: an investigation using an uncontrolled manifold analysis
Source: PubMed Central journal article supplement (PMC10995316; doi:10.3389/fspor.2024.1382194), 2024-03-22
Supplement: Datasheet3.pdf [file Datasheet3.pdf]

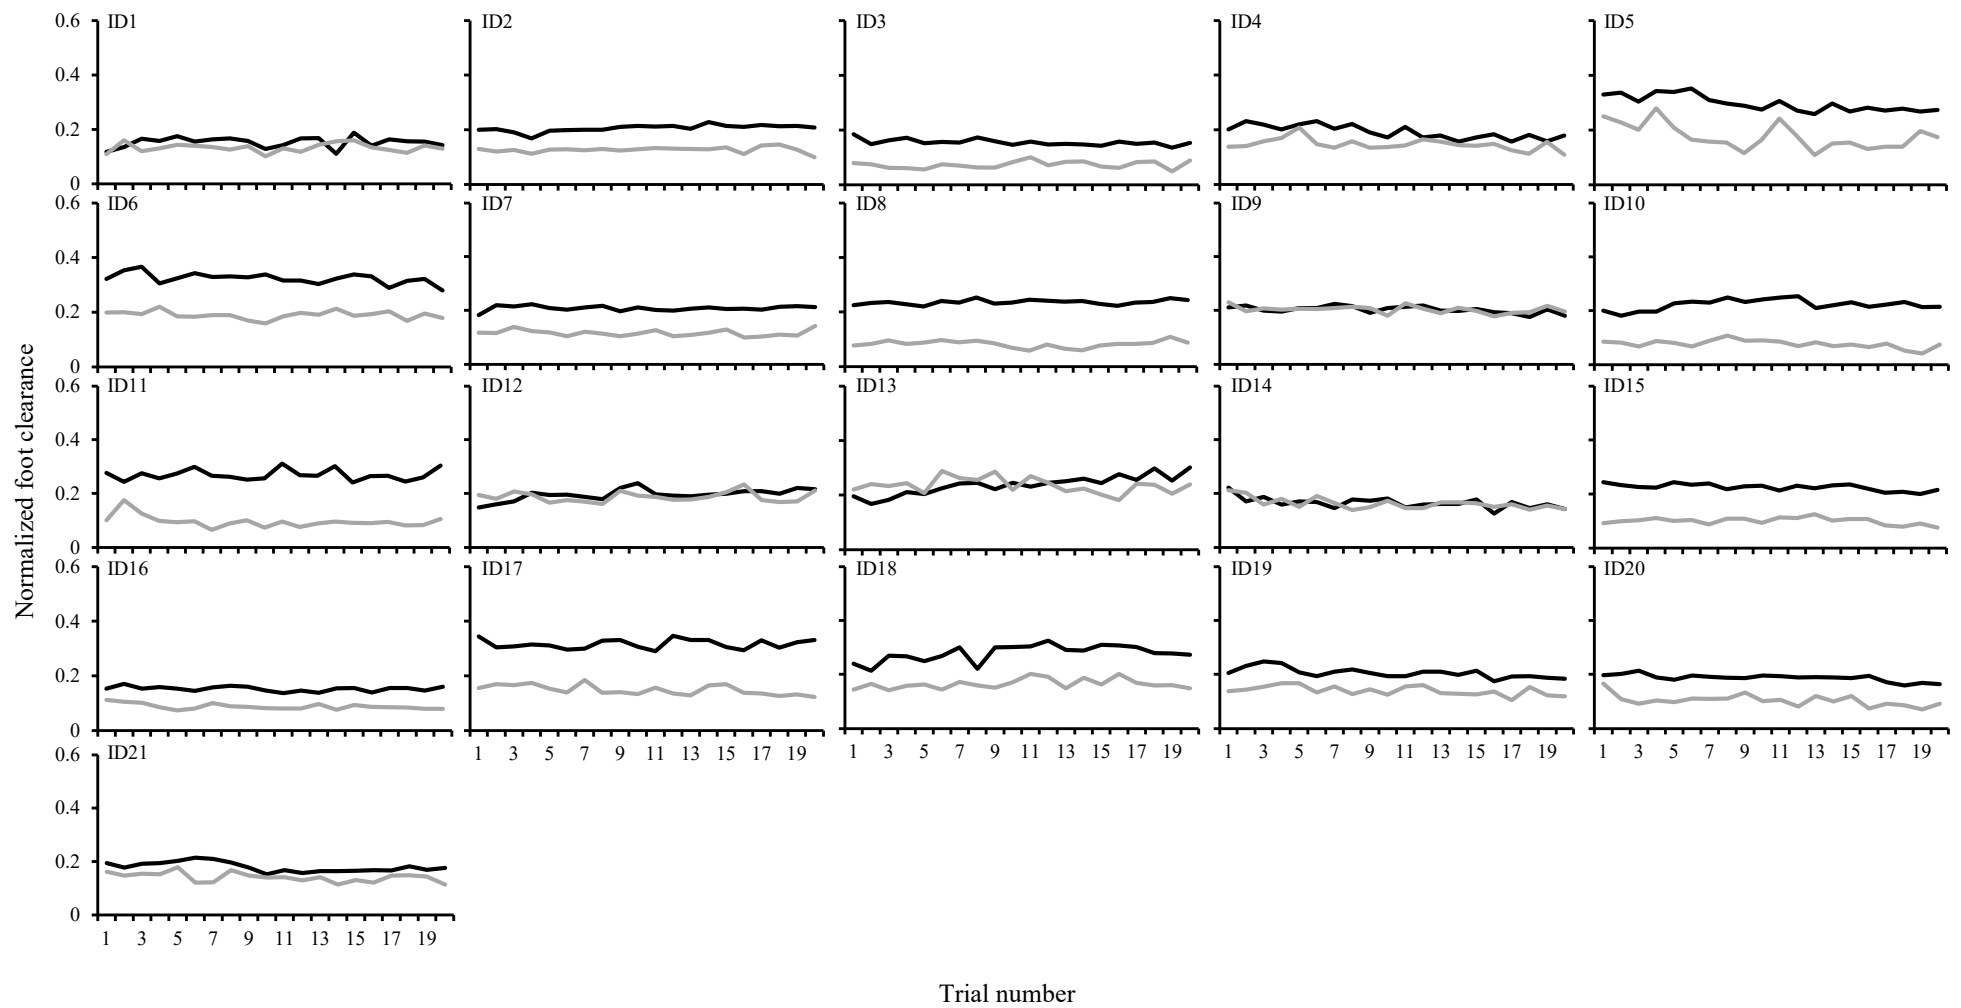

**Supplementary Figure S3.** Graphs of the normalized foot clearance for younger adults. Black lines represent the leading limb. Gray lines represent the trailing limb.
